# Supplementary material
Source: Springer Nature journal article supplement (https://www.springermedizin.de/resource/supplementary/40248_2014_157_MOESM1_ESM.pdf/9686236)

a

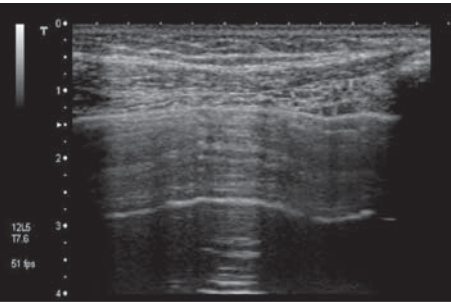

b

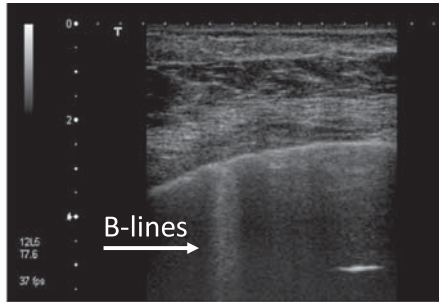

Supplement: MOESM1 [file 9686236]
